# Supplementary material
Source: PubMed Central journal article supplement (PMC1564205)

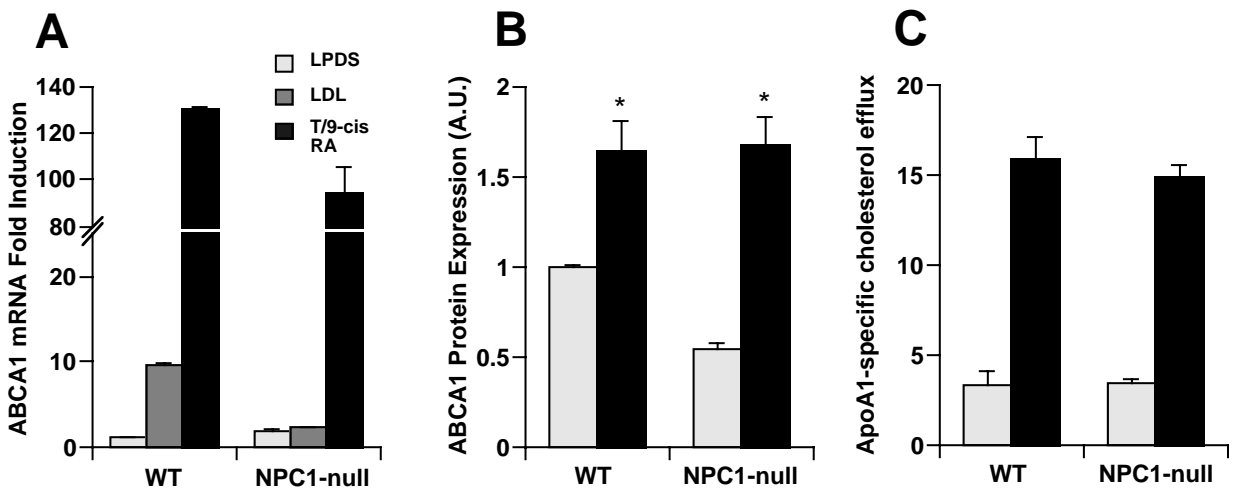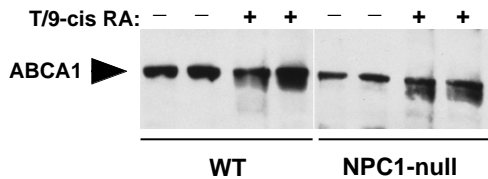

Supplement: pnas_0606218103_1.pdf [file pnas_0606218103_1.pdf]

**A**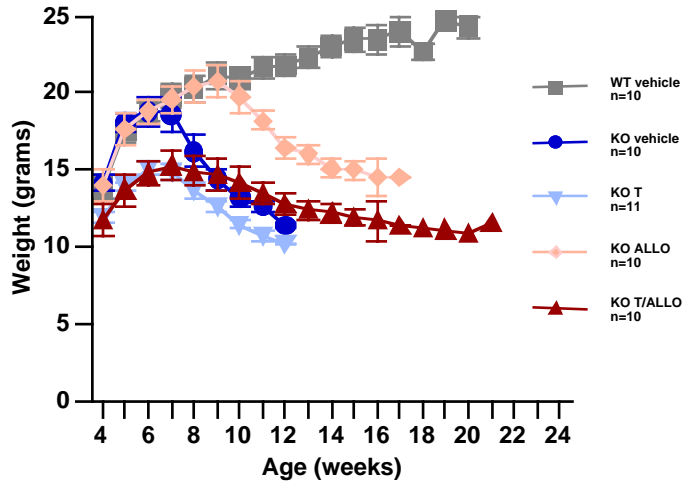**B**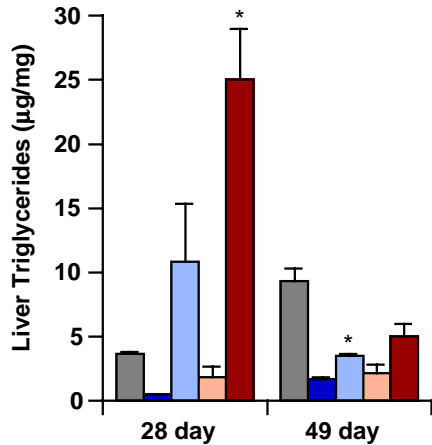

Supplement: pnas_0606218103_2.pdf [file pnas_0606218103_2.pdf]

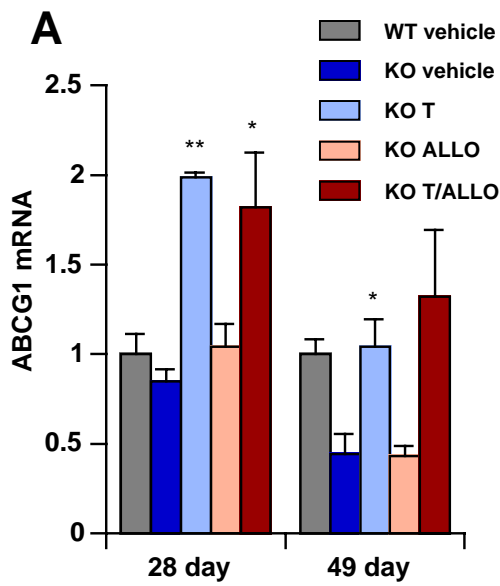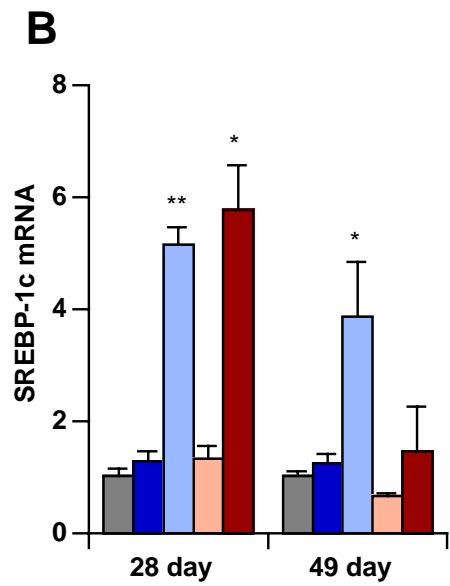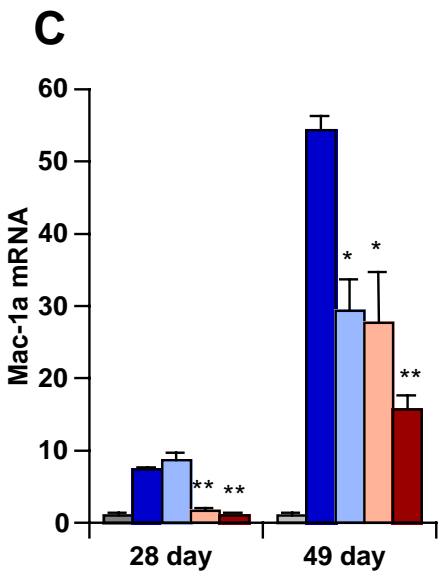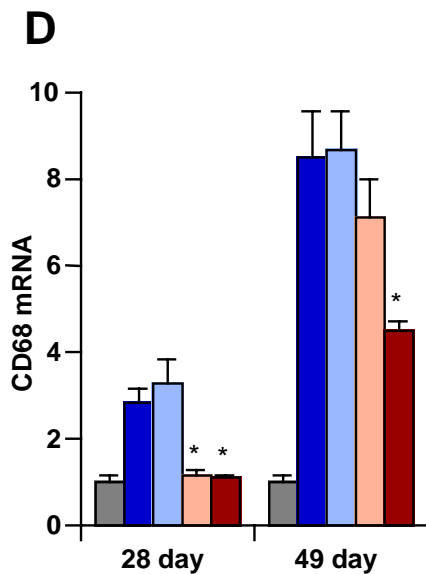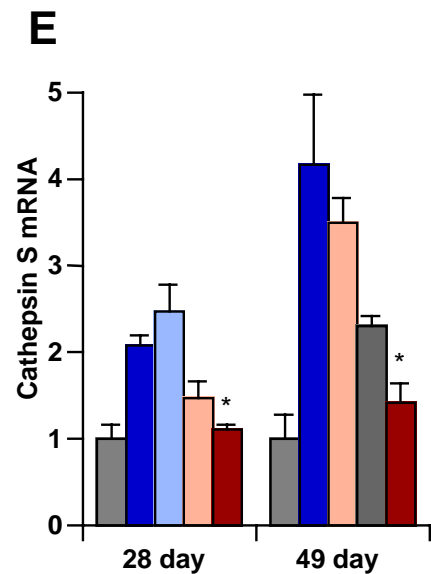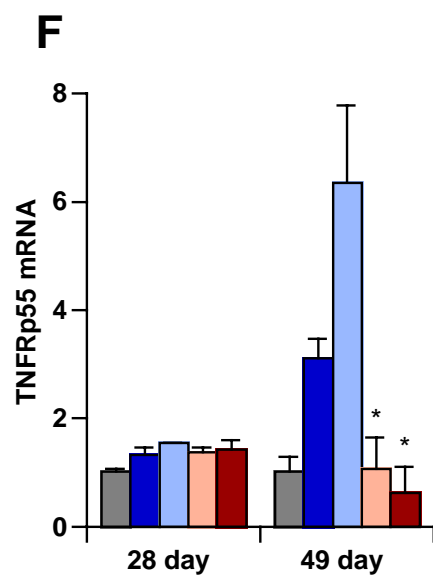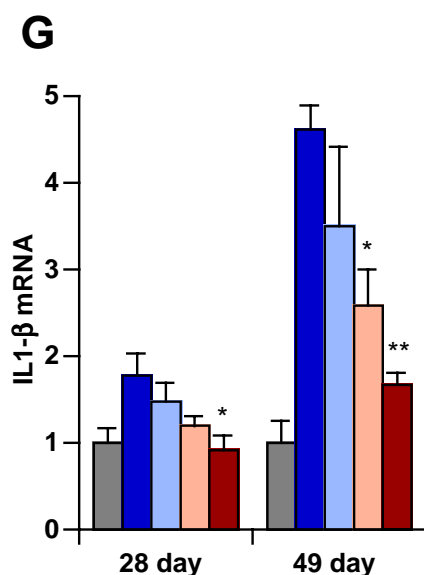

Supplement: pnas_0606218103_3.pdf [file pnas_0606218103_3.pdf]

WT vehicle

KO vehicle

KO T/ALLO

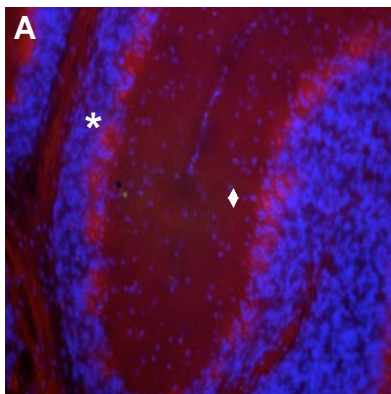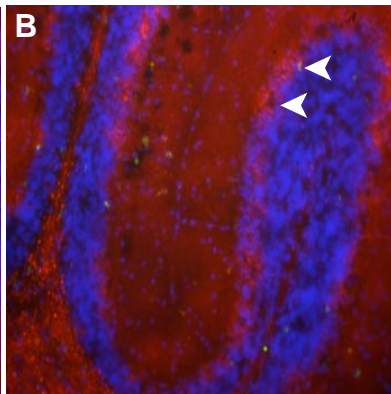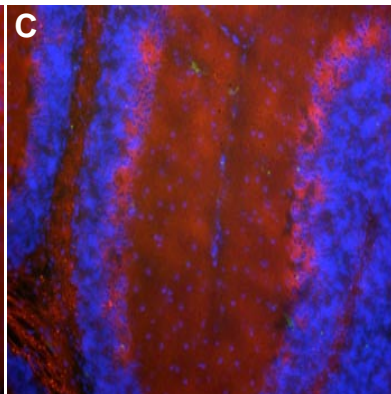

Lobes  
IX-X

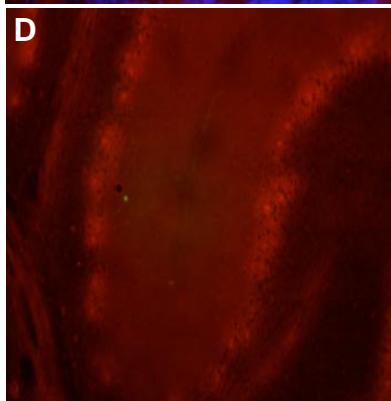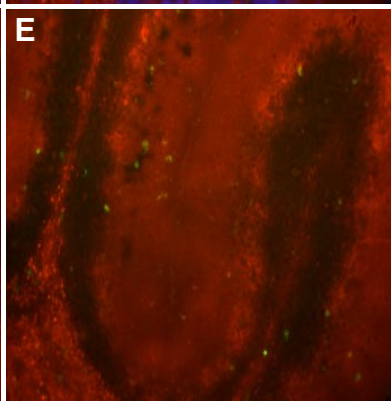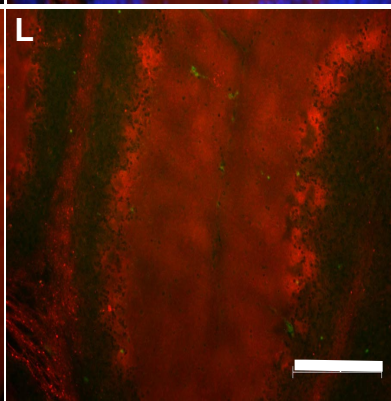

Supplement: pnas_0606218103_4.pdf [file pnas_0606218103_4.pdf]

**A**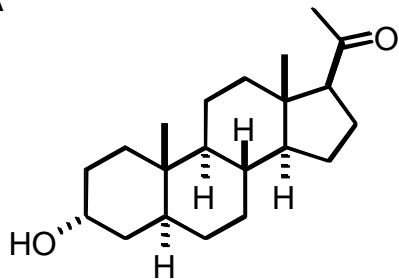**Allopregnanolone**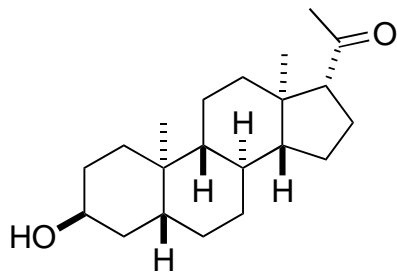***ent*-Allopregnanolone****B**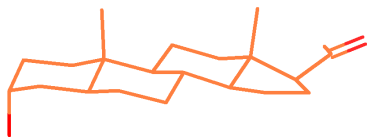**Allopregnanolone**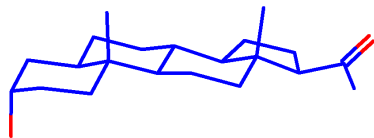***ent*-Allopregnanolone**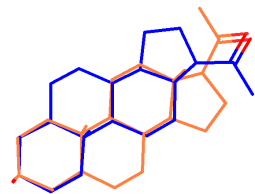**overlay**

Supplement: pnas_0606218103_5.pdf [file pnas_0606218103_5.pdf]

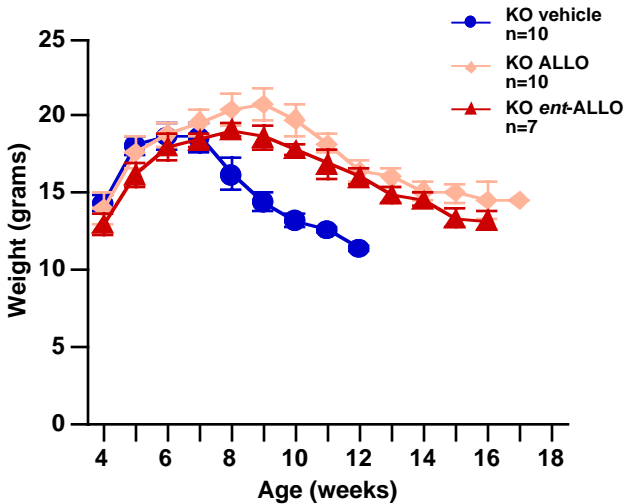

Supplement: pnas_0606218103_6.pdf [file pnas_0606218103_6.pdf]

**A**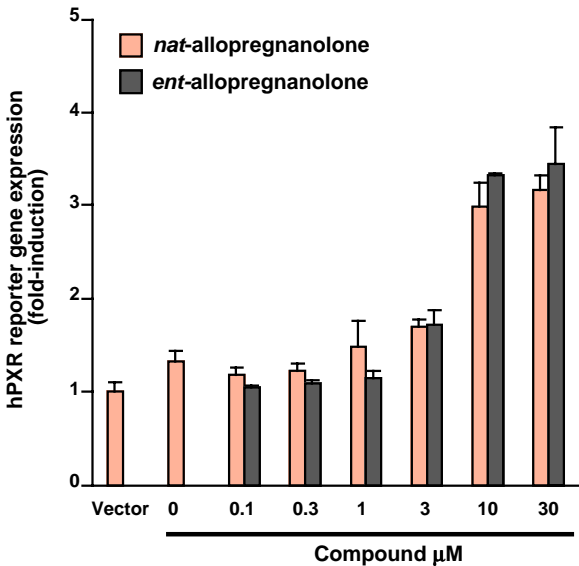**B**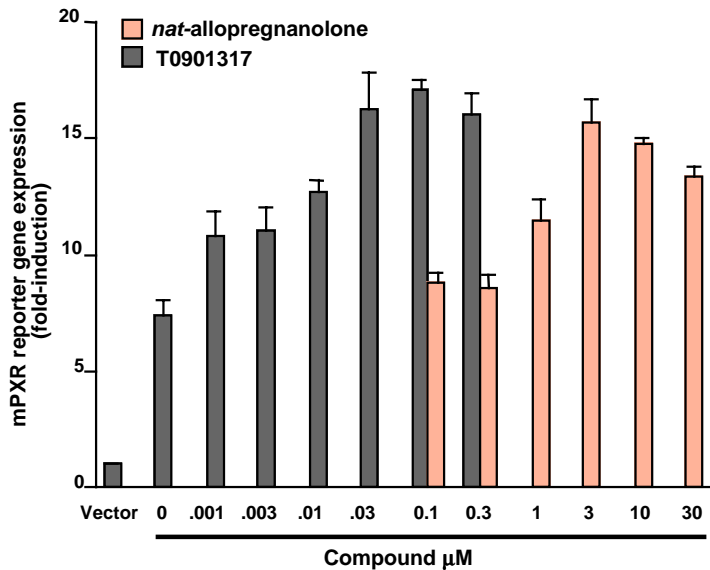

Supplement: pnas_0606218103_7.pdf [file pnas_0606218103_7.pdf]
